# Supplementary material
Source: PubMed Central journal article supplement (PMC3653370)
Supplement: Supp_Fig1.pdf [file Supp_Fig1.pdf]

## Supplementary Data

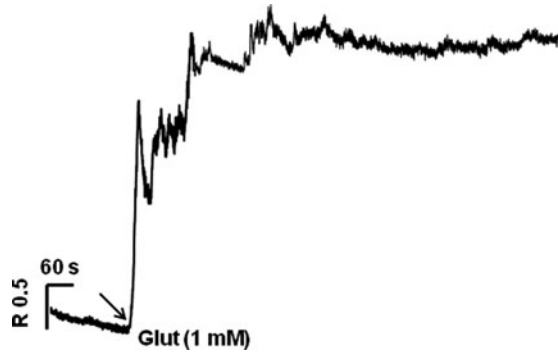

**SUPPLEMENTARY FIG. S1.** Effect of glutamate at 1 mM in P7 neural precursors (NPs). A representative trace showing  $[Ca^{2+}]_i$  response induced by 1 mM glutamate applied for 10 s. The  $[Ca^{2+}]_i$  levels in the cytosol were very high and did not return to resting level even after several minutes of washing out glutamate suggesting the loss of  $Ca^{2+}$  signal/homeostasis. A similar phenomenon was observed in all cells tested in different cultures of P7 NPs.
