# Supplementary material
Source: PubMed Central journal article supplement (PMC3653370)
Supplement: Supp_Fig2.pdf [file Supp_Fig2.pdf]

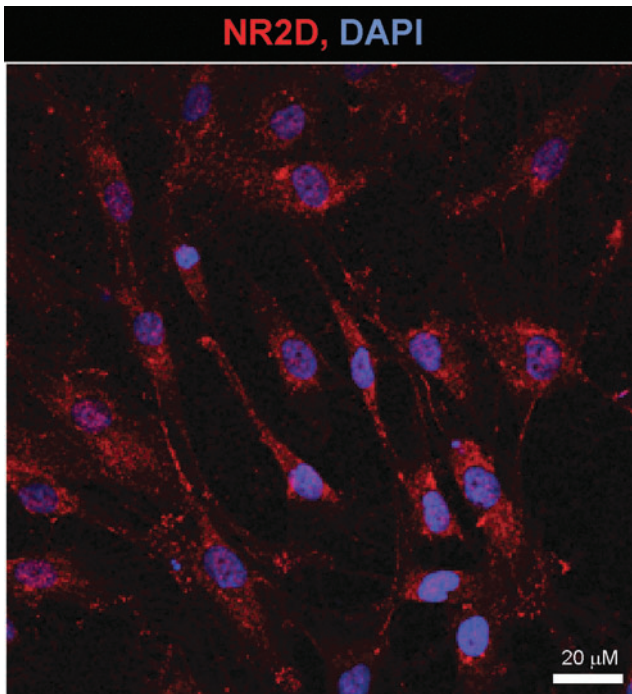

**SUPPLEMENTARY FIG. S2.** Confocal image showing the expression of NR2D subunit of N-Methyl-D-aspartic acid receptor in P7 NPs. Nuclei are visualized with 4',6-diamidino-2-phenylindole dihydrochloride (DAPI). Scale bar = 20 μm.
